# Supplementary material for: The influence of the ocean circulation state on ocean carbon storage and CO 2 drawdown potential in an Earth system model
Source: Copernicus journal article supplement (doi:10.5194/bg-2017-166), 2017-06-09
Supplement: Supplementary file 1 [file bg-2017-166-supplement.pdf]

# **The influence of the ocean circulation state on ocean carbon storage and CO<sub>2</sub> drawdown potential in an Earth system model**

Malin Ödalen<sup>1</sup>, Jonas Nycander<sup>1</sup>, Kevin I. C. Oliver<sup>2</sup>, Laurent Brodeau<sup>1,3</sup>, and Andy Ridgwell<sup>4,5</sup>

<sup>1</sup>Department of Meteorology, Stockholm University, 106 91 Stockholm, Sweden

<sup>2</sup>National Oceanography Centre, Southampton, University of Southampton, Southampton SO14 3ZH, United Kingdom

<sup>3</sup>Barcelona Supercomputer Center, Barcelona, Spain

<sup>4</sup>School of Geographical Sciences, Bristol University, Bristol, UK

<sup>5</sup>Department of Earth Sciences, University of California-Riverside, Riverside, CA, USA

*Correspondence to:* Malin Ödalen (malin.odalen@misu.su.se)

**Table S.1.** Minimum (*min*) and maximum (*max*) of zonal average ocean overturning streamfunction [Sv] below 556 m for each ensemble member (*Ens. mem.*) for the Atlantic and Pacific basin, as well as for the Northern and Southern hemispheres.

| Ens.<br>mem. | Atlantic<br>min | Atlantic<br>max | Pacific<br>min | Pacific<br>max | N. Hem<br>min | N. Hem<br>max | S. Hem<br>min | S. Hem<br>max |
|--------------|-----------------|-----------------|----------------|----------------|---------------|---------------|---------------|---------------|
| PIES278      | -0.72994        | 14.351          | -10.622        | 0.82759        | -3.0596       | 13.969        | -8.5206       | 16.109        |
| SE1          | -0.90637        | 13.343          | -9.5614        | 0.67199        | -3.289        | 12.758        | -7.821        | 17.496        |
| SE2          | -1.7676         | 13.393          | -10.431        | 0.19119        | -4.6907       | 13.037        | -10.125       | 14.205        |
| SE3          | -0.8106         | 12.208          | -10.614        | -0.0054238     | -1.1717       | 11.73         | -9.8906       | 6.0054        |
| SE4          | -2.2848         | 17.18           | -12.118        | 5.1812         | -5.4032       | 19.826        | -9.61         | 37.308        |
| SE5          | -0.9551         | 12.01           | -8.216         | 0.35484        | -2.5218       | 11.695        | -5.685        | 17.737        |
| SE6          | -1.5467         | 18.001          | -14.518        | 2.8046         | -6.0425       | 17.998        | -14.648       | 12.872        |
| SE7          | -1.2487         | 16.588          | -9.3395        | 0.80844        | -3.6345       | 16.071        | -8.73         | 11.925        |
| SE8          | -0.69754        | 10.881          | -10.634        | 1.2097         | -2.2037       | 10.584        | -8.3644       | 21.294        |
| SE9          | -0.58072        | 8.6163          | -7.7396        | 0.63172        | -1.956        | 7.9347        | -5.4419       | 22.768        |
| SE10         | -1.0229         | 14.554          | -15.156        | 2.4531         | -4.9616       | 15.176        | -14.387       | 18.074        |
| SE11         | -2.5161         | 15.909          | -13.521        | 0.92228        | -7.613        | 15.614        | -15.484       | 11.301        |
| SE12         | -0.55727        | 3.5649          | -6.7039        | 0.6078         | -3.3234       | 2.4071        | -7.6655       | 7.3873        |

## S Supplementary material

This document includes supplementary figures and tables, containing data that is described or shown in other forms in the manuscript. Table ?? lists the maxima and minima in ocean overturning streamfunction that are used to calculate ( $\psi_{max} - \psi_{min}$ ) in Tables ?? and ?? and Figures ?? and ?. Figure ?? shows the changes in  $T_{avg}$  for the *SE* ensemble, with respect to the control simulation *PIES278*, versus the change in  $pCO_2^{atm}$  that is estimated to result from the corresponding change in  $C_{sat}$ .

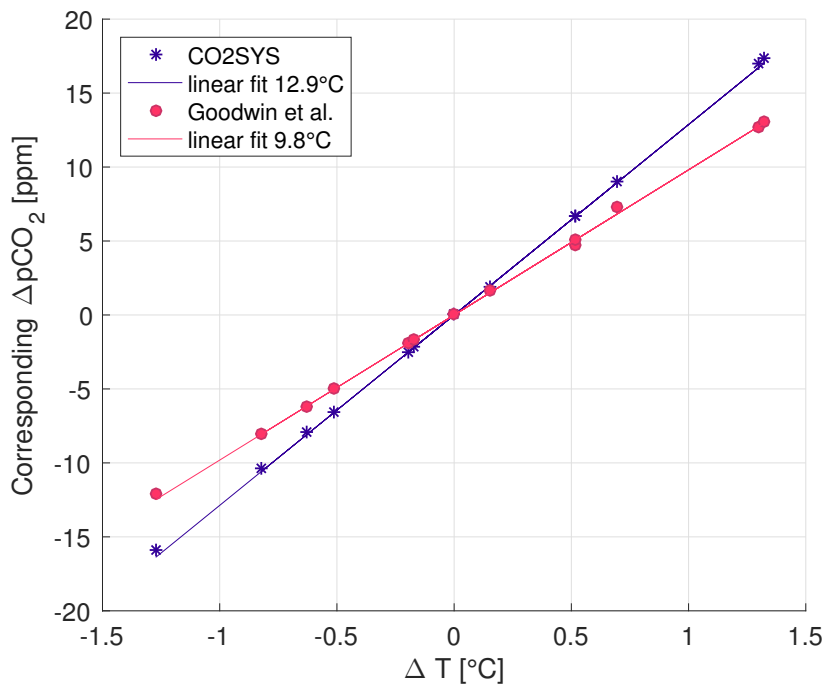

**Figure S.1.** Global ocean average temperature change ( $\Delta T_{avg}$ ) and the changes in  $pCO_2^{atm}$  corresponding to the  $\Delta C_{sat}$  caused by the changes in temperature in the ensemble members  $SE1 - SE12$ . The control state is found at coordinates (0,0).
