# Supplementary material for: The influence of the ocean circulation state on ocean carbon storage and CO 2 drawdown potential in an Earth system model
Source: Copernicus journal article supplement (doi:10.5194/bg-2017-166), 2017-06-09
Supplement: Supplementary file [file bg-2017-166-AC1-supplement.pdf]

**Table B1** Diagnostic variables of the pre-industrial control states of PMIP2 and CMIP5/PMIP3 (temperature and salinity as read from Fig. 9.18. of WG1 in IPCC AR5 and AMOC as given in Table 1 in Muglia and Schmittner (2015)) compared to similar diagnostics for our ensemble *SE1-SE12* and control state *PIES278*.

| Variables                                                     | PMIP2 + CMIP5/PMIP3<br>pre-industrial control states | Ödalen et al. <u>cGENIE</u><br><i>SE1-SE12</i> and <i>PIES278</i> |
|---------------------------------------------------------------|------------------------------------------------------|-------------------------------------------------------------------|
| Potential temperature<br>(°C), <u>N.Atl.</u>                  | 2.9 – 6.4 <sup>1</sup>                               | 4.6 – 8.0 <sup>2</sup>                                            |
| Potential temperature<br>(°C), <u>S.Atl.</u>                  | -1.6 – 2.0 <sup>3</sup>                              | -0.3 – 3.7 <sup>4</sup>                                           |
| Salinity, <u>N.Atl.</u>                                       | 34.8 – 35.5 <sup>1</sup>                             | 35.3 – 35.6 <sup>2</sup>                                          |
| Salinity, <u>S.Atl.</u>                                       | 34.6 – 35.0 <sup>3</sup>                             | 34.9 – 35.1 <sup>4</sup>                                          |
| AMOC (1 Sv = 10 <sup>6</sup> m <sup>3</sup> s <sup>-1</sup> ) | 12.64 – 23.02 <sup>5</sup>                           | 2.0 – 18.0 <sup>6</sup>                                           |

<sup>1</sup> North Atlantic PMIP grid point: 55.5°N, 14.5°W, 2,184 m depth

<sup>2</sup> North Atlantic cGENIE closest corresponding grid cell: 51-56°N, 10-20°W, 1,738-2,100 m depth

<sup>3</sup> South Atlantic PMIP grid point: 50°S, 5°E, 3,636 m depth

<sup>4</sup> South Atlantic cGENIE closest corresponding grid cell: 46-51°S, 0-10°E, 3,008-3,576 m depth

<sup>5</sup> Muglia and Schmittner (2015), PMIP3 pre-industrial control ensemble AMOC at 25°N, average with interval of one standard deviation

<sup>6</sup> cGENIE maximum Atlantic overturning. The *SE* ensemble member with halved wind stress and low vertical (diapycnal) diffusivity has a collapsed AMOC circulation (2.0 Sv). The average of this variable for all other *SE*s is 13.8 Sv (range 8.3 – 18.0 Sv).
